# Supplementary material for: The NEXT-1 (Next generation pErsonalized tX with mulTi-omics and preclinical model) trial: prospective molecular screening trial of metastatic solid cancer patients, a feasibility analysis
Source: PubMed Central journal article supplement (PMC4741771; doi:10.18632/oncotarget.5188), 2015-09-09
Supplement: oncotarget-06-33358-s001.pdf [file oncotarget-06-33358-s001.pdf]

SUPPLEMENTARY TABLES AND FIGURE

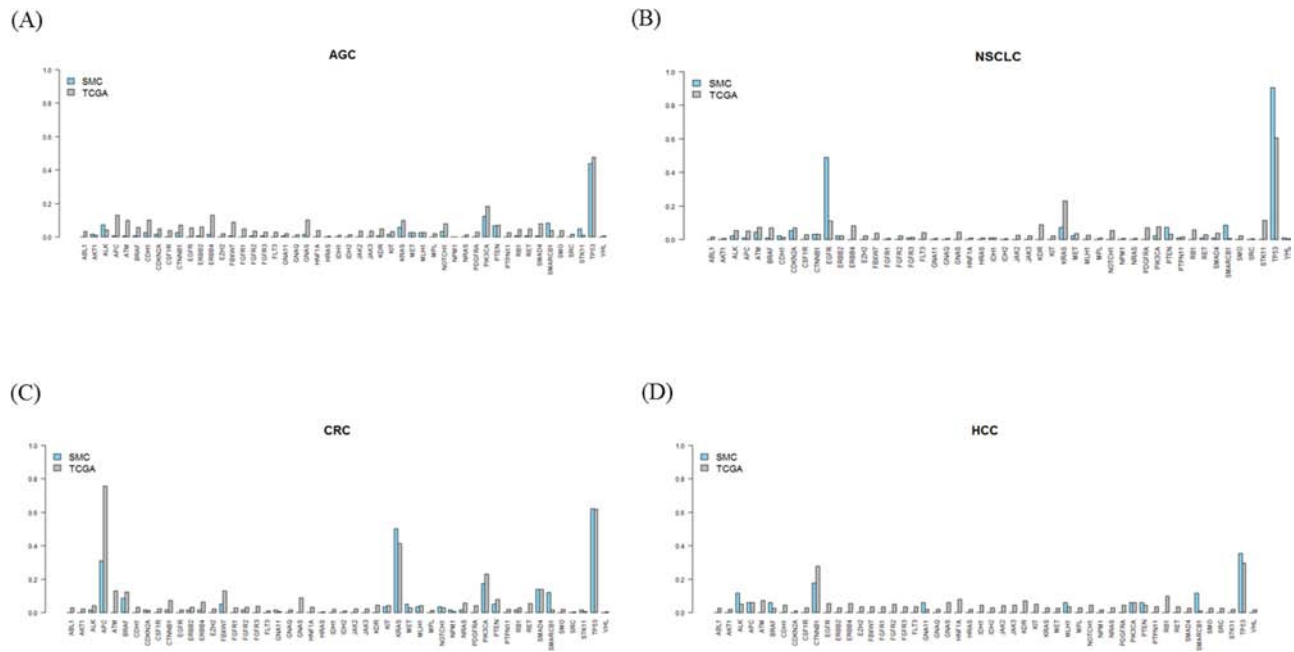

**Supplementary Figure S1: Molecular aberrations in specific tumor types as compared with those of TCGA data.** A. Somatic mutations in gastric cancer ( $n = 123$ ) B. non-small cell lung cancer ( $n = 94$ ) C. colon cancer ( $N = 58$ ) D. hepatocellular carcinoma ( $n = 17$ ).

**Supplementary Table S1: Molecular aberrations matched to targeted agents**

| <b>Molecular aberrations matched to targeted agents in clinical trials, <i>N</i> = 31</b>   |                                        |                                                                      |                 |
|---------------------------------------------------------------------------------------------|----------------------------------------|----------------------------------------------------------------------|-----------------|
| <b>Molecular Target Identified</b>                                                          | <b>Matched Therapy</b>                 | <b>Disease type</b>                                                  | <b><i>N</i></b> |
| ALK (IHC)                                                                                   | Crizotinib                             | Non-small cell lung cancer                                           | 1               |
| BRAF mutation                                                                               | Vemurafenib                            | Melanoma<br>Metastatic carcinoma of unknown origin                   | 3               |
| HER2 amplification                                                                          | Pertuzumab                             | Gastric adenocarcinoma                                               | 4               |
| KRAS wild-type                                                                              | Panitumumab                            | Colorectal adenocarcinoma                                            | 1               |
| EGFR mutation                                                                               | Afatinib                               | Non-small cell lung cancer                                           | 3               |
| HER2 amplification                                                                          | Lapatinib                              | Gastric adenocarcinoma                                               | 1               |
| MET amplification                                                                           | Anti-MET targeted agent                | Gastric adenocarcinoma                                               | 1               |
| EGFR T790M                                                                                  | Anti-T790M targeted agent <sup>a</sup> | Non-small cell lung cancer                                           | 7               |
| EGFR T790M                                                                                  | Anti-T790M targeted agent <sup>b</sup> | Non-small cell lung cancer                                           | 3               |
| EGFR mutation                                                                               | Anti-EGFR targeted agent <sup>c</sup>  | Non-small cell lung cancer                                           | 3               |
| EGFR mutation                                                                               | Anti-EGFR targeted agent <sup>d</sup>  | Non-small cell lung cancer                                           | 3               |
| FGFR2 amplification                                                                         | Anti-FGFR targeted agent               | Gastric adenocarcinoma                                               | 1               |
| <b>Molecular aberrations matched to targeted agents in clinical practice, <i>N</i> = 72</b> |                                        |                                                                      |                 |
| <b>Molecular Target Identified</b>                                                          | <b>Matched Therapy</b>                 | <b>Disease type</b>                                                  | <b><i>N</i></b> |
| EGFR mutation                                                                               | Erlotinib                              | Non-small cell lung cancer<br>Pancreatic adenocarcinoma              | 13              |
| EGFR mutation/<br>amplification                                                             | Gefitinib                              | Non-small cell lung cancer<br>Metastatic carcinoma of unknown origin | 19              |
| HER2 amplification                                                                          | Trastuzumab                            | Gastric adenocarcinoma                                               | 15              |
| KRAS mutation                                                                               | Cetuximab                              | Colorectal adenocarcinoma                                            | 14              |
| KIT amplification/mutation                                                                  | Imatinib                               | GIST*, Soft tissue sarcoma                                           | 4               |
| PIK3CA mutation                                                                             | Everolimus                             | Renal cell carcinoma                                                 | 2               |
|                                                                                             | Pazopanib                              | Soft tissue sarcoma                                                  | 4               |
| BRAF mutation                                                                               | Sorafenib                              | Hepatocellular carcinoma                                             | 1               |

\*Gastrointestinal stromal tumors

**Supplementary Table S2: List of customized NanoString CNV codeset and matched TaqMan Copy Number Assay IDs**

| NanoString CNV codeset |              |                           | matched qPCR assay          |
|------------------------|--------------|---------------------------|-----------------------------|
| Gene Name              | Genome Build | Genomic Coordinates       | TaqMan Copy Number Assay ID |
| CCND1                  | Hg18         | chr11:69166461–69166560   | Hs03772544_cn (CCND1_1)     |
| CCND1                  | Hg18         | chr11:69170198–69170280   | Hs03776261_cn (CCND1_2)     |
| CCND1                  | Hg18         | chr11:69173802–69173877   | Hs02666923_cn (CCND1_3)     |
| CCNE1                  | Hg18         | chr19:34996365–34996462   | Hs00772084_cn (CCNE1_1)     |
| CCNE1                  | Hg18         | chr19:35000303–35000396   | Hs00452646_cn (CCNE1_2)     |
| CCNE1                  | Hg18         | chr19:35005181–35005262   | Hs01813172_cn (CCNE1_3)     |
| KRAS                   | Hg18         | chr12:25261832–25261919   | Hs06927012_cn (KRAS_1)      |
| KRAS                   | Hg18         | chr12:25275152–25275241   | Hs06962121_cn (KRAS_2)      |
| KRAS                   | Hg18         | chr12:25285835–25285922   | Hs06973152_cn (KRAS_3)      |
| PIK3CA                 | Hg18         | chr3:180415123–180415222  | Hs00725627_cn (PIK3CA_1)    |
| PIK3CA                 | Hg18         | chr3:180423950–180424049  | Hs00185640_cn (PIK3CA_2)    |
| PIK3CA                 | Hg18         | chr3:180432391–180432478  | Hs02708380_cn (PIK3CA_3)    |
| MET                    | Hg18         | chr7:116136002–116136089  | Hs05008121_cn (MET_1)       |
| MET                    | Hg18         | chr7:116160904–116161003  | Hs04985499_cn (MET_2)       |
| MET                    | Hg18         | chr7:116214262–116214361  | Hs05020704_cn (MET_3)       |
| FGFR1                  | Hg18         | chr8:38393783–38393874    | Hs02702320_cn (FGFR1_1)     |
| FGFR1                  | Hg18         | chr8:38413246–38413333    | Hs06184858_cn (FGFR1_2)     |
| FGFR1                  | Hg18         | chr8:38432656–38432745    | Hs05051339_cn (FGFR1_3)     |
| FGFR2                  | Hg18         | chr10:123248163–123248262 | Hs05182482_cn (FGFR2_1)     |
| FGFR2                  | Hg18         | chr10:123290793–123290892 | Hs05176095_cn (FGFR2_2)     |
| FGFR2                  | Hg18         | chr10:123325834–123325907 | Hs05114893_cn (FGFR2_3)     |
| MDM2                   | Hg18         | chr12:67498111–67498194   | Hs03058884_cn (MDM2_1)      |
| MDM2                   | Hg18         | chr12:67504615–67504714   | Hs03013618_cn (MDM2_2)      |
| MDM2                   | Hg18         | chr12:67518205–67518304   | Hs06362713_cn (MDM2_3)      |
| AURKA                  | Hg18         | chr20:54380758–54380852   |                             |
| AURKA                  | Hg18         | chr20:54387730–54387829   |                             |
| AURKA                  | Hg18         | chr20:54395073–54395172   |                             |
| CDK4                   | Hg18         | chr12:56428625–56428714   |                             |
| CDK4                   | Hg18         | chr12:56430637–56430731   |                             |
| CDK4                   | Hg18         | chr12:56430858–56430945   |                             |
| CDK6                   | Hg18         | chr7:92102617–92102714    |                             |
| CDK6                   | Hg18         | chr7:92192438–92192525    |                             |
| CDK6                   | Hg18         | chr7:92279486–92279585    |                             |

(Continued)

| NanoString CNV codeset |              |                          | matched qPCR assay          |
|------------------------|--------------|--------------------------|-----------------------------|
| Gene Name              | Genome Build | Genomic Coordinates      | TaqMan Copy Number Assay ID |
| CDKN1A                 | Hg18         | chr6:36760296–36760371   |                             |
| CDKN1A                 | Hg18         | chr6:36760902–36760995   |                             |
| CDKN1A                 | Hg18         | chr6:36761312–36761391   |                             |
| CDKN2A                 | Hg18         | chr9:21963369–21963468   |                             |
| CDKN2A                 | Hg18         | chr9:21964186–21964285   |                             |
| CDKN2A                 | Hg18         | chr9:21965829–21965928   |                             |
| EGFR                   | Hg18         | chr7:55072102–55072181   |                             |
| EGFR                   | Hg18         | chr7:55130363–55130434   |                             |
| EGFR                   | Hg18         | chr7:55188580–55188673   |                             |
| ERBB2                  | Hg18         | chr17:35112859–35112934  |                             |
| ERBB2                  | Hg18         | chr17:35124948–35125029  |                             |
| ERBB2                  | Hg18         | chr17:35135268–35135347  |                             |
| ERBB3                  | Hg18         | chr12:54764300–54764394  |                             |
| ERBB3                  | Hg18         | chr12:54771042–54771141  |                             |
| ERBB3                  | Hg18         | chr12:54778487–54778586  |                             |
| IGF1R                  | Hg18         | chr15:97040030–97040129  |                             |
| IGF1R                  | Hg18         | chr15:97164717–97164804  |                             |
| IGF1R                  | Hg18         | chr15:97284983–97285082  |                             |
| KLF5                   | Hg18         | chr13:72534198–72534277  |                             |
| KLF5                   | Hg18         | chr13:72539794–72539893  |                             |
| KLF5                   | Hg18         | chr13:72546812–72546911  |                             |
| MITF                   | Hg18         | chr3:69914121–69914220   |                             |
| MITF                   | Hg18         | chr3:69997161–69997260   |                             |
| MITF                   | Hg18         | chr3:70077697–70077786   |                             |
| MYC                    | Hg18         | chr8:128818714–128818790 |                             |
| MYC                    | Hg18         | chr8:128820773–128820868 |                             |
| MYC                    | Hg18         | chr8:128821228–128821321 |                             |
| TNIK                   | Hg18         | chr3:172563186–172563285 |                             |
| TNIK                   | Hg18         | chr3:172603694–172603790 |                             |
| TNIK                   | Hg18         | chr3:172643608–172643707 |                             |

**Supplementary Table S3: Validation of nanostring CNV assay using quantitative PCR, FISH, IHC**

| Gene             | Type of cancer                       | Type of Specimen | Clinical Report | Nanostring CNV | matched qPCR assay   |                      |                      | Results of IHC | Copy number by FISH |
|------------------|--------------------------------------|------------------|-----------------|----------------|----------------------|----------------------|----------------------|----------------|---------------------|
| <b>CCND1 amp</b> |                                      |                  |                 |                | CCND1_1 CN Predicted | CCND1_2 CN Predicted | CCND1_3 CN Predicted |                |                     |
|                  | melanoma, colon                      | FF               | POS             | 15             | 15                   | 15                   | 13                   |                |                     |
|                  | adenocarcinoma, colon                | FF               | POS             | 7              | 4                    | 7                    | 5                    |                |                     |
|                  | adenocarcinoma, colon                | FF               | NEG             | 2              | 2                    | 3                    | 2                    |                |                     |
|                  | adenocarcinoma, rectum               | FF               | NEG             | 2              | 3                    | 3                    | 3                    |                |                     |
|                  | melanoma, pleura                     | FFPE             | POS             | 8              | 2                    | 7                    | 3                    |                |                     |
|                  | melanoma, maxilla                    | FFPE             | POS             | 20             | 22                   | 31                   | 21                   |                |                     |
|                  | adenocarcinoma, stomach              | FFPE             | POS             | 11             | 5                    | 6                    | 5                    |                |                     |
|                  | adenocarcinoma, stomach              | FFPE             | NEG             | 2              | 3                    | 3                    | 3                    |                |                     |
|                  | adenocarcinoma, stomach              | FFPE             | NEG             | 2              | 1                    | 3                    | 1                    |                |                     |
| <b>CCNE1 amp</b> |                                      |                  |                 |                | CCNE1_1 CN Predicted | CCND1_2 CN Predicted | CCND1_3CN Predicted  |                |                     |
|                  | neuroendocrine carcinoma, lymph node | FFPE             | POS             | 19             | 60                   | ND                   | 33                   |                |                     |
|                  | adenocarcinoma, stomach              | FFPE             | POS             | 6              | 20                   | 6                    | 6                    |                |                     |
|                  | adenocarcinoma, stomach              | FFPE             | POS             | 10             | 35                   | 11                   | 9                    |                |                     |
|                  | adenocarcinoma, stomach              | FFPE             | POS             | 18             | 53                   | 1                    | 20                   |                |                     |
|                  | adenocarcinoma, stomach              | FFPE             | NEG             | 2              | 8                    | 3                    | 2                    |                |                     |
|                  | adenocarcinoma, rectum               | FF               | NEG             | 2              | 3                    | 3                    | 3                    |                |                     |
| <b>KRAS amp</b>  |                                      |                  |                 |                | KRAS_1 CN Predicted  | KRAS_2 CN Predicted  | KRAS_3 CN Predicted  |                |                     |
|                  | adenocarcinoma, colon                | FF               | POS             | 21             | 28                   | 28                   | 32                   |                |                     |

(Continued)

| Gene              | Type of cancer                                           | Type of Specimen | Clinical Report | Nanostring CNV | matched qPCR assay          |                             |                             | Results of IHC | Copy number by FISH |
|-------------------|----------------------------------------------------------|------------------|-----------------|----------------|-----------------------------|-----------------------------|-----------------------------|----------------|---------------------|
|                   | adenocarcinoma, rectum                                   | FF               | POS             | 17             | 22                          | 23                          | 25                          |                |                     |
|                   | adenocarcinoma, rectum                                   | FF               | POS             | 6              | 5                           | 4                           | 4                           |                |                     |
|                   | adenocarcinoma, stomach                                  | FFPE             | POS             | 16             | 9                           | 10                          | 10                          |                |                     |
|                   | adenocarcinoma, stomach                                  | FFPE             | POS             | 11             | 0                           | 1                           | 1                           |                |                     |
|                   | adenocarcinoma, colon                                    | FF               | NEG             | 2              | 2                           | 2                           | 2                           |                |                     |
|                   | adenocarcinoma, stomach                                  | FFPE             | NEG             | 3              | 1                           | 2                           | 1                           |                |                     |
| <b>PIK3CA amp</b> |                                                          |                  |                 |                | PIK3CA_1<br>CN<br>Predicted | PIK3CA_2<br>CN<br>Predicted | PIK3CA_3<br>CN<br>Predicted |                |                     |
|                   | adenocarcinoma, stomach                                  | FFPE             | POS             | 13             | 0                           | 0                           | 0                           |                |                     |
|                   | urothelial carcinoma, bladder                            | FF               | POS             | 4              | 5                           | 6                           | 5                           |                |                     |
|                   | adenocarcinoma, stomach                                  | FFPE             | NEG             | 2              | 3                           | 4                           | 2                           |                |                     |
|                   | adenocarcinoma, stomach                                  | FFPE             | NEG             | 2              | 2                           | 2                           | 1                           |                |                     |
|                   | adenocarcinoma, rectum                                   | FF               | NEG             | 2              | 3                           | 2                           | 2                           |                |                     |
|                   | adenocarcinoma, colon                                    | FF               | NEG             | 2              | 3                           | 3                           | 3                           |                |                     |
| <b>CDK4 amp</b>   |                                                          |                  |                 |                |                             |                             |                             |                |                     |
|                   | adenocarcinoma, stomach                                  | FF               | POS             | 29             |                             |                             |                             | positive       | N/A                 |
|                   | melanoma, pleura                                         | FFPE             | POS             | 59             |                             |                             |                             | positive       | 3.72                |
|                   | inflammatory malignant fibrous histiocytoma, soft tissue | FFPE             | POS             | 10             |                             |                             |                             | positive       | 3.45                |
|                   | melanoma, maxilla                                        | FFPE             | POS             | 66             |                             |                             |                             | N/A            | N/A                 |
|                   | undifferentiated pleomorphic sarcoma, lung               | FFPE             | POS             | 6              |                             |                             |                             | positive       | 2.75                |

(Continued)

| Gene     | Type of cancer                        | Type of Specimen | Clinical Report | Nanostring CNV | matched qPCR assay  |                     |                     | Results of IHC | Copy number by FISH |
|----------|---------------------------------------|------------------|-----------------|----------------|---------------------|---------------------|---------------------|----------------|---------------------|
| MDM2 amp |                                       |                  |                 |                | MDM2_1 CN Predicted | MDM2_2 CN Predicted | MDM2_3 CN Predicted |                |                     |
|          | spindle cell sarcoma, lung            | FF               | POS             | 21             | 19                  | 18                  | 14                  | positive       | N/A                 |
|          | melanoma, maxilla                     | FFPE             | POS             | 28             | 60                  | 46                  | 45                  | positive       | N/A                 |
|          | adenocarcinoma, stomach               | FFPE             | POS             | 6              | 5                   | 4                   | 7                   | positive       | 5.11                |
|          | alveolar rhabdomyosarcoma, lymph node | FFPE             | POS             | 17             | 0                   | 0                   | 7                   |                |                     |
|          | adenocarcinoma, stomach               | FFPE             | NEG             | 2              | 2                   | 2                   | 3                   |                |                     |
|          | adenocarcinoma, stomach               | FFPE             | NEG             | 2              | 1                   | 1                   | 2                   |                |                     |
|          | adenocarcinoma, rectum                | FFPE             | NEG             | 1              | 2                   | 2                   | 2                   |                |                     |
|          | appendiceal cancer, appendix          | FF               | NEG             | 1              | 2                   | 2                   | 2                   |                |                     |
